# Supplementary material
Source: PubMed Central journal article supplement (PMC3586964)

## Supplementary Appendix

**Supplementary Table 1.** The association of serum adiponectin levels with all-cause mortality, using baseline estimated GFR

|                      | ADPN, median (range) | Hazard Ratio (95% Confidence Interval) |                         |                         |                         |
|----------------------|----------------------|----------------------------------------|-------------------------|-------------------------|-------------------------|
|                      |                      | Unadjusted                             | Model 1 <sup>a</sup>    | Model 2 <sup>b</sup>    | Model 3 <sup>c</sup>    |
| <hr/>                |                      |                                        |                         |                         |                         |
| Overall population   |                      |                                        |                         |                         |                         |
| Per natural log ADPN | 10.1 (0.04-127.1)    | <b>1.76 (1.41-2.20)</b>                | <b>1.79 (1.43-2.26)</b> | <b>1.48 (1.17-1.87)</b> | <b>1.40 (1.08-1.81)</b> |
| <hr/>                |                      |                                        |                         |                         |                         |
| ADPN Tertile         |                      |                                        |                         |                         |                         |
| 1                    | 5.0 (0.04-7.4)       | 1 [Reference]                          | 1 [Reference]           | 1 [Reference]           | 1 [Reference]           |
| 2                    | 10.1 (7.4-14.1)      | 1.19 (0.72-1.95)                       | 1.13 (0.69-1.87)        | 1.03 (0.62-1.72)        | 1.02 (0.61-1.71)        |
| 3                    | 22.0 (14.1-127.1)    | <b>2.17 (1.39-3.38)</b>                | <b>2.27 (1.43-3.60)</b> | <b>1.81 (1.12-2.93)</b> | <b>1.66 (1.00-2.77)</b> |

Abbreviations: lnADPN, natural log-transformed adiponectin

<sup>a</sup>Model 1 adjusts for age and gender

<sup>b</sup>Model 2 adjusts for covariates in model 1 plus baseline estimated glomerular filtration rate, serum albumin, and log-transformed C-reactive protein

<sup>c</sup>Model 3 adjusts for covariates in model 2 plus Charlson Comorbidity Index, abdominal circumference, systolic blood pressure, time since kidney transplantation, and malnutrition-inflammation score

**Supplementary Table 2.** The association of serum adiponectin with the death with a functioning graft\*

|                      | ADPN, median<br>(IQRrange) | Hazard Ratio (95% Confidence Interval) |                         |                         |                         |
|----------------------|----------------------------|----------------------------------------|-------------------------|-------------------------|-------------------------|
|                      |                            | Unadjusted                             | Model 1 <sup>a</sup>    | Model 2 <sup>b</sup>    | Model 3 <sup>c</sup>    |
| Overall population   |                            |                                        |                         |                         |                         |
| Per natural log ADPN | 10.0 (0.04-127.1)          | <b>1.77 (1.45-2.17)</b>                | <b>1.78 (1.45-2.20)</b> | <b>1.49 (1.20-1.85)</b> | <b>1.24 (1.00-1.55)</b> |
| ADPN Tertile         |                            |                                        |                         |                         |                         |
| 1                    | 5.1 (0.04-7.37)            | 1 [Reference]                          | 1 [Reference]           | 1 [Reference]           | 1 [Reference]           |
| 2                    | 10.0 (7.4-14.1)            | 1.43 (0.93-2.19)                       | 1.33 (0.86-2.04)        | 1.12 (0.72-1.75)        | 1.17 (0.75-1.82)        |
| 3                    | 22.0 (14.1-127.1)          | <b>2.19 (1.47-3.27)</b>                | <b>2.20 (1.45-3.34)</b> | <b>1.72 (1.12-2.65)</b> | 1.36 (0.86-2.14)        |

Abbreviations: lnADPN, natural log-transformed adiponectin

\*Data available for N=850

<sup>a</sup>Model 1 adjusts for age and gender

<sup>b</sup>Model 2 adjusts for covariates in model 1 plus estimated glomerular filtration rate, serum albumin, and log-transformed C-reactive protein

<sup>c</sup>Model 3 adjusts for covariates in model 2 plus Charlson Comorbidity Index, abdominal circumference, systolic blood pressure, time since kidney transplantation, and malnutrition-inflammation score

### **Supplementary Figure Legend**

**Supplementary Figure 1.** Repeated measurements of estimated GFR over time by ADPN tertile. Repeated measures of CKD-Epi-based GFR were available for 2 years following study enrolment. The test of hypothesis using PROC GLM for between groups effects was significant ( $p < 0.0001$ ), indicating that median eGFR were different across ADPN tertiles. The within group tests indicated that there was a significant time effect ( $p < 0.0001$ ), demonstrating that eGFR declined with time. However, there was no interaction between ADPN tertile and time with respect to eGFR ( $p = 0.12$ ).

Supplementary Figure 1.

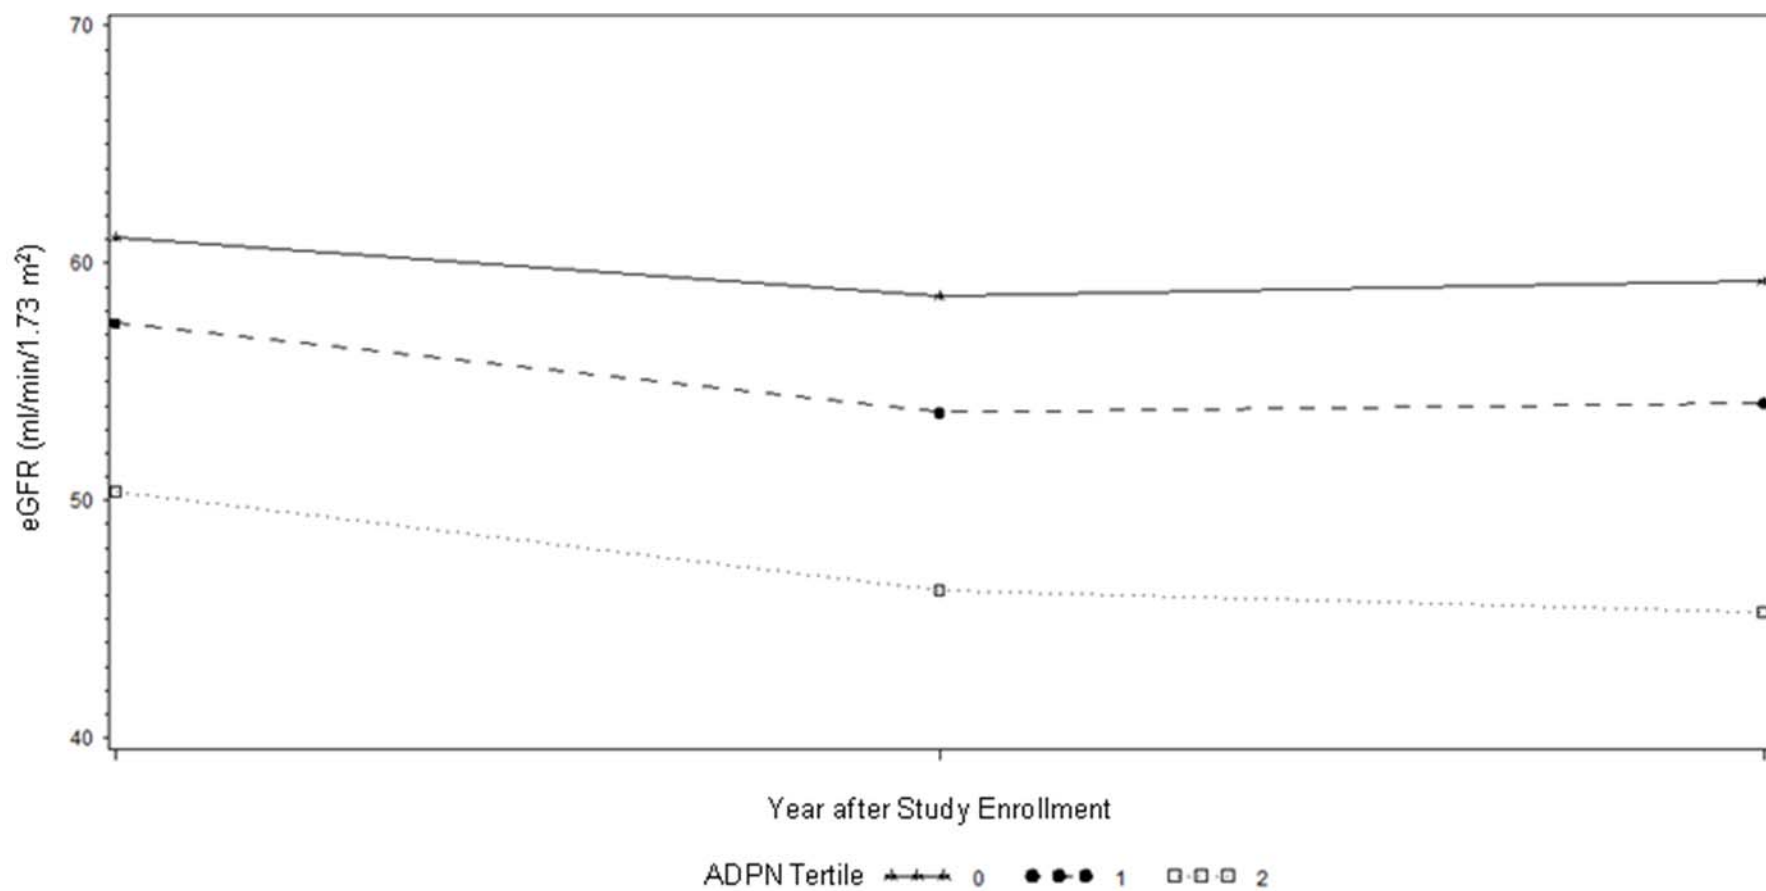

Supplement: CJN.04370512_CJN04370512SupplementaryData.pdf [file CJN.04370512_CJN04370512SupplementaryData.pdf]
